# Supplementary material for: Influence of Polymer Composition on the Controlled Release of Docetaxel: A Comparison of Non-Degradable Polymer Films for Oesophageal Drug-Eluting Stents
Source: PubMed Central journal article supplement (PMC7284596; doi:10.3390/pharmaceutics12050444), 2020-05-11
Supplement: pharmaceutics-12-00444-s001.pdf [file pharmaceutics-12-00444-s001.pdf]

# Supplementary Materials: Influence of Polymer Composition on the Controlled Release of Docetaxel: A Comparison of Non-Degradable Polymer Films for Oesophageal Drug-Eluting Stents

Paris Fouladian, Franklin Afinjuomo, Mohammad Arafat, Amanda Bergamin, Yunmei Song, Anton Blencowe and Sanjay Garg

**Table S1.** Actual amount of DTX and polymer used in each formulation.

| Formulation        | Actual Amount of DTX (mg) | Actual Amount of Polymer (mg) |
|--------------------|---------------------------|-------------------------------|
| PEVA <sub>1</sub>  | 4.04                      | 400                           |
| PEVA <sub>5</sub>  | 21.05                     | 400                           |
| PEVA <sub>10</sub> | 44.44                     | 400                           |
| PU <sub>1</sub>    | 3.88                      | 385                           |
| PU <sub>5</sub>    | 20.26                     | 385                           |
| PU <sub>10</sub>   | 42.44                     | 385                           |
| Psi <sub>1</sub>   | 2.80                      | 278                           |
| Psi <sub>5</sub>   | 14.63                     | 278                           |
| Psi <sub>10</sub>  | 30.9                      | 278                           |

**Table S2.** Equations for release kinetics models.

| Mathematical Models | Equation                        |
|---------------------|---------------------------------|
| Zero order          | $Q_t = Q_0 + K_0 t$             |
| First order         | $\ln Q_t = \ln Q_0 + K_1 t$     |
| Higuchi             | $Q_t = KH t^{1/2}$              |
| Hixson-Crowell      | $Q_0^{1/3} - Q_t^{1/3} = K_s t$ |
| Korsmeyer-Peppas    | $Q_t/Q_\infty = Kktn$           |

$Q_t$ : amount of drug released in time  $t$ ;  $Q_0$ : initial amount of drug in the formulaion;  $Q_\infty$ : total amount of drug dissolved when the dosage form is exhausted;  $K_0$ ,  $K_1$ ,  $KH$ ,  $K_s$ ,  $Kk$ : release rate constants;  $n$ : release exponent

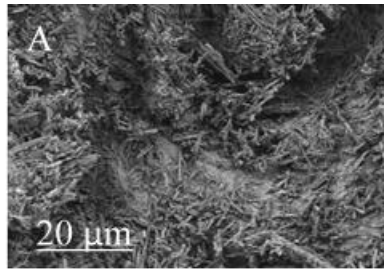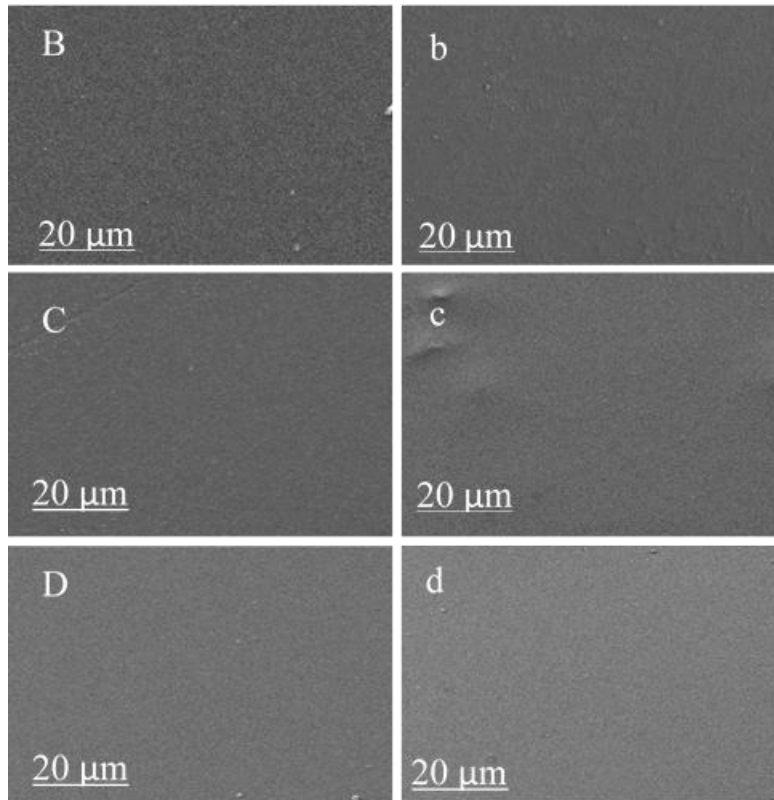

**Figure S1.** SEM images of (A) DTX, (B) PEVA, (b) PEVA<sub>10</sub>, (C) PU, (c) PU<sub>10</sub>, (D) Psi and (d) Psi<sub>10</sub>.

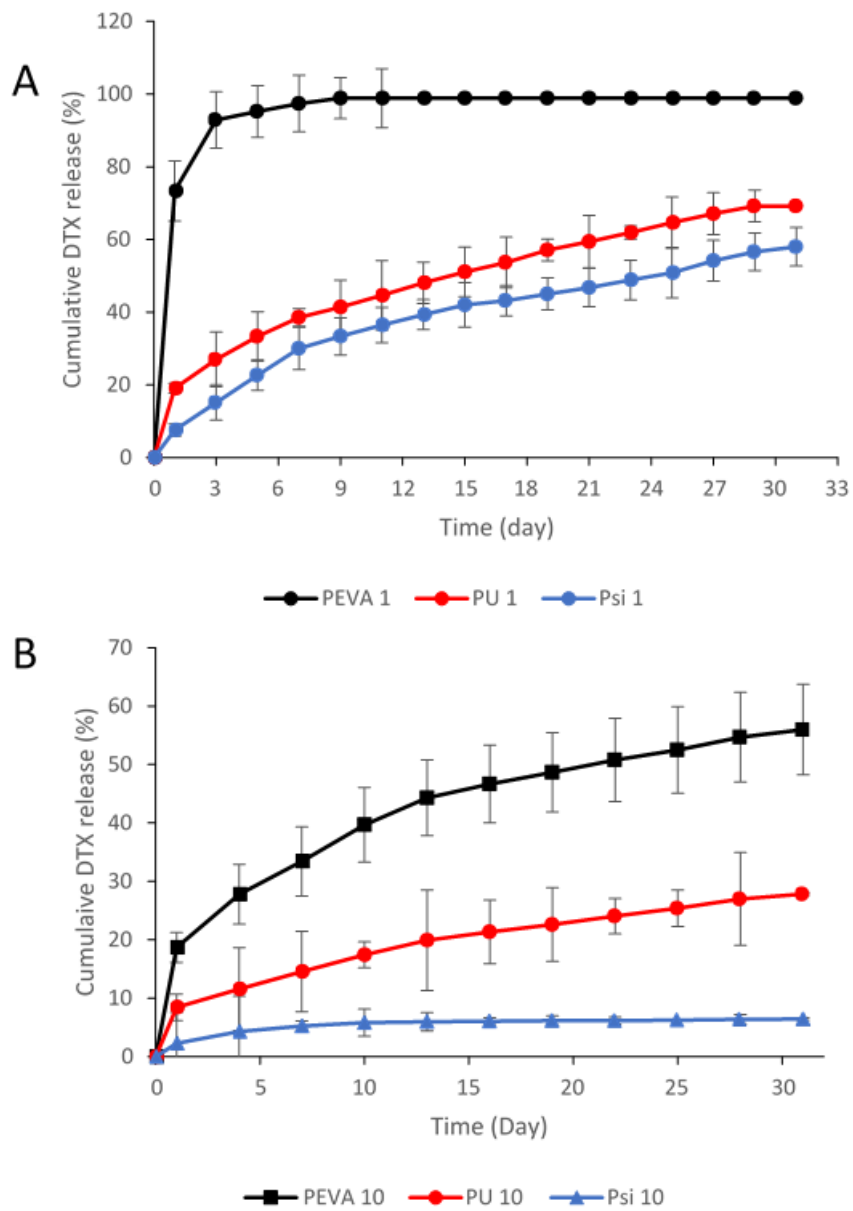

**Figure S2.** (A) In-vitro DTX release profile of PEVA<sub>1</sub>, PU<sub>1</sub> and PS<sub>1</sub>, (B) In-vitro DTX release profile of PEVA<sub>10</sub>, PU<sub>10</sub> and PS<sub>10</sub>.

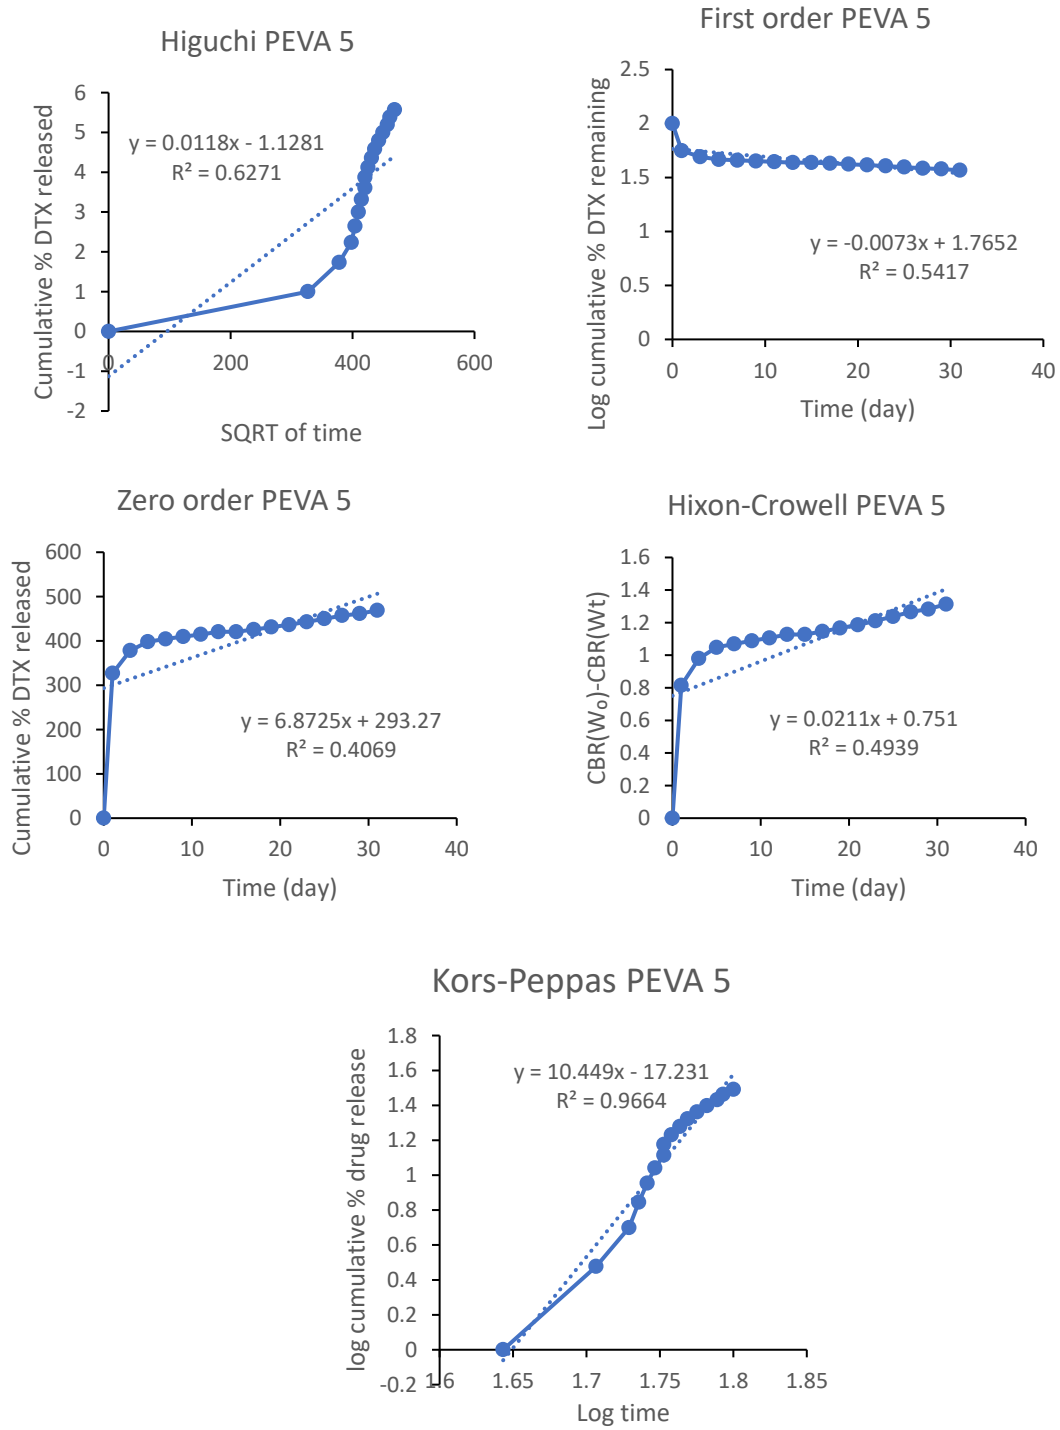

**Figure S3.** PEVA<sub>5</sub> in-vitro release data to Higuchi, first order, zero-order, Hixon and Kors-Peppas kinetics models.

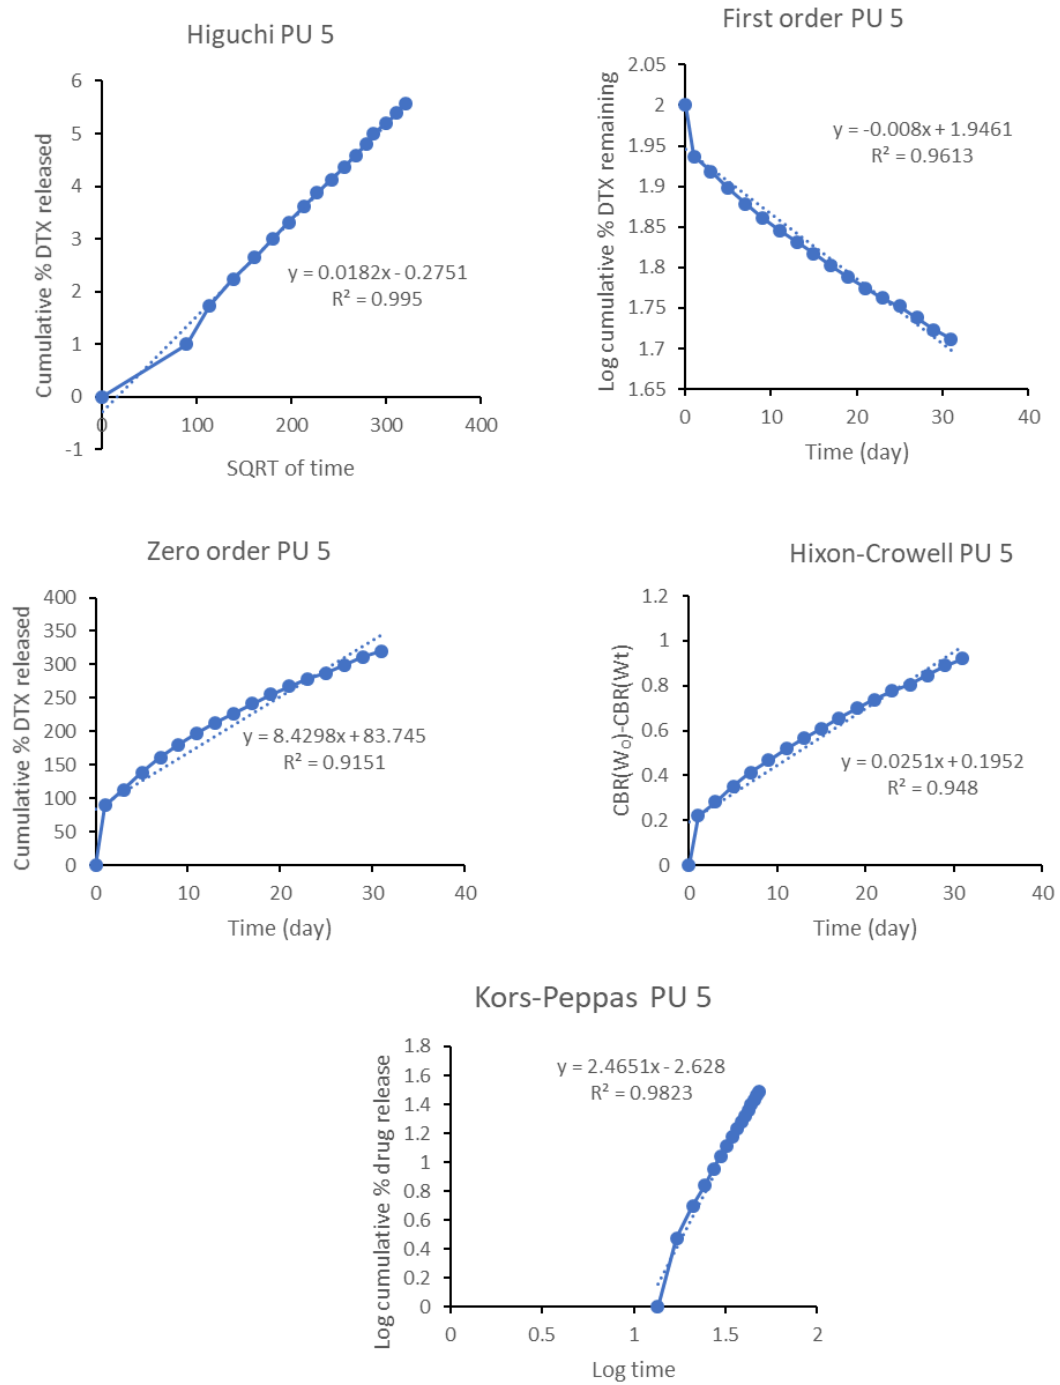

**Figure S4.** PU<sub>5</sub> in-vitro release data to Higuchi, first order, zero-order, Hixon and Kors-Peppas kinetics models.

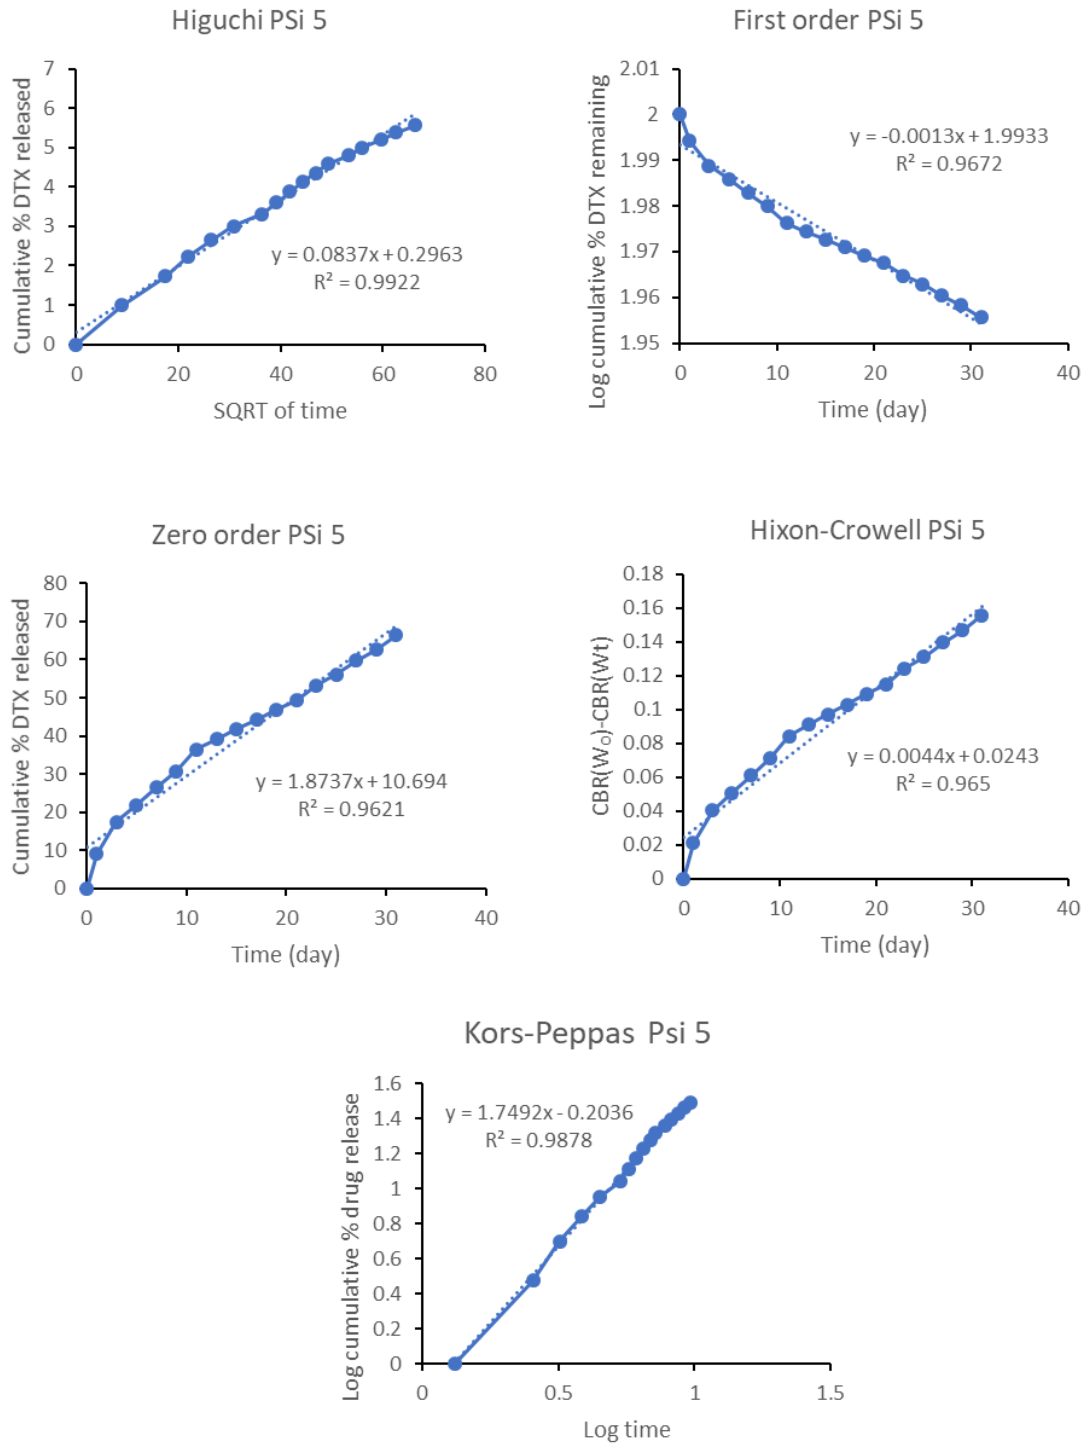

**Figure S5.** Psi <sub>5</sub> in-vitro release data to Higuchi, first order, zero-order, Hixon and Kors-peppas kinetics models.

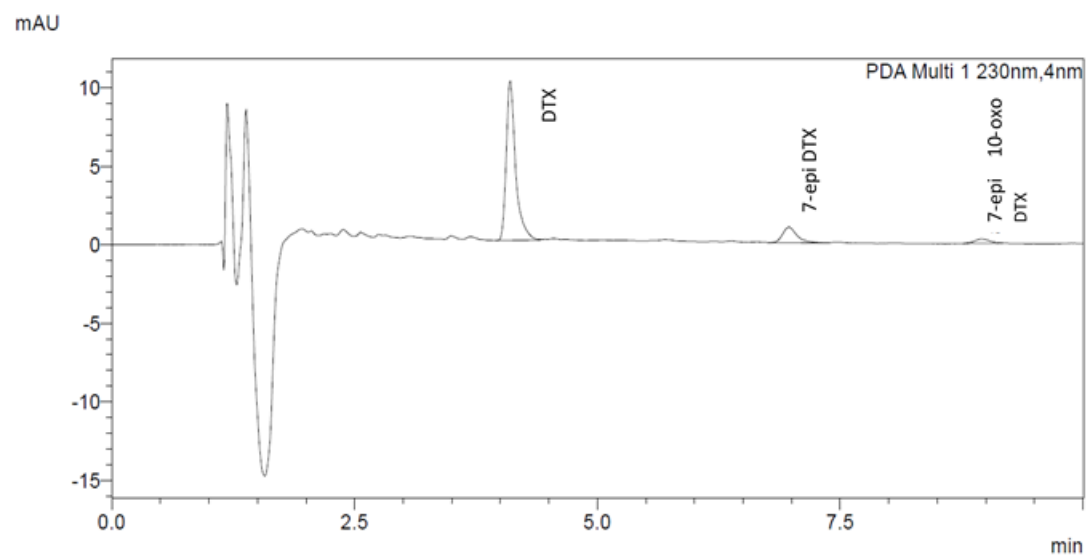

**Figure S6.** HPLC chromatogram of the degradation studies in presence of release media.
